# Supplementary material for: The Steady State Great Ape? Long Term Isotopic Records Reveal the Effects of Season, Social Rank and Reproductive Status on Bonobo Feeding Behavior
Source: PubMed Central journal article supplement (PMC5023189; doi:10.1371/journal.pone.0162091), 2016-09-14
Supplement: pone.0162091.s003.pdf [file pone.0162091.s003.pdf]

| hair ID (lab no.) | individ. | sex | rank* | birth year | rep. state | age infant (days) | disappear day | disappear month | disappear year | sampling date | hair section date | $\delta^{13}\text{C} \text{‰}$ vPDB | $\delta^{15}\text{N} \text{‰}$ AIR |
|-------------------|----------|-----|-------|------------|------------|-------------------|---------------|-----------------|----------------|---------------|-------------------|-------------------------------------|------------------------------------|
| 13405             | Eva      | f   | 4     | 1967       | cyc        | 1690              | 20            | 11              | 2009           | 1-Sep-09      | 18-Aug-09         | -25.6                               | 8.3                                |
| 13405             | Eva      | f   | 4     | 1967       | cyc        | 1648              | 20            | 11              | 2009           | 1-Sep-09      | 7-Jul-09          | -25.6                               | 8.5                                |
| 14098             | Eva      | f   | 4     | 1967       | lac        | 1639              | 20            | 11              | 2009           | 19-Jul-09     | 28-Jun-09         | -25.3                               | 8.8                                |
| 14098             | Eva      | f   | 4     | 1967       | lac        | 1584              | 20            | 11              | 2009           | 20-Jul-09     | 4-May-09          | -25.5                               | 8.9                                |
| 21708             | Gwen     | f   | 14    | 1994       | lac        | 1025              | NA            | NA              | NA             | 13-Jul-10     | 6-Jul-10          | -25.5                               | 8.7                                |
| 21708             | Gwen     | f   | 14    | 1994       | lac        | 1011              | NA            | NA              | NA             | 13-Jul-10     | 22-Jun-10         | -25.5                               | 8.6                                |
| 21708             | Gwen     | f   | 14    | 1994       | lac        | 997               | NA            | NA              | NA             | 13-Jul-10     | 8-Jun-10          | -25.6                               | 8.6                                |
| 21708             | Gwen     | f   | 14    | 1994       | lac        | 983               | NA            | NA              | NA             | 13-Jul-10     | 25-May-10         | -25.7                               | 8.6                                |
| 21708             | Gwen     | f   | 14    | 1994       | lac        | 969               | NA            | NA              | NA             | 13-Jul-10     | 11-May-10         | -25.7                               | 8.5                                |
| 21708             | Gwen     | f   | 14    | 1994       | lac        | 955               | NA            | NA              | NA             | 13-Jul-10     | 27-Apr-10         | -25.5                               | 8.5                                |
| 21708             | Gwen     | f   | 14    | 1994       | lac        | 934               | NA            | NA              | NA             | 13-Jul-10     | 6-Apr-10          | -25.9                               | 8.8                                |
| 13506             | Gwen     | f   | 14    | 1994       | lac        | 578               | NA            | NA              | NA             | 29-Apr-09     | 15-Apr-09         | -25.5                               | 8.2                                |
| 13506             | Gwen     | f   | 14    | 1994       | lac        | 536               | NA            | NA              | NA             | 29-Apr-09     | 4-Mar-09          | -25.8                               | 8.4                                |
| 13507             | Gwen     | f   | 14    | 1994       | lac        | 599               | NA            | NA              | NA             | 3-Jun-09      | 6-May-09          | -25.5                               | 8.4                                |
| 13507             | Gwen     | f   | 14    | 1994       | lac        | 529               | NA            | NA              | NA             | 3-Jun-09      | 25-Feb-09         | -26.0                               | 8.0                                |
| 21569             | Hanna    | f   | 1     | 1984       | lac        | 1491              | 15            | 4               | 2010           | 21-Feb-10     | 31-Jan-10         | -25.4                               | 8.6                                |
| 21569             | Hanna    | f   | 1     | 1984       | lac        | 1477              | 15            | 4               | 2010           | 21-Feb-10     | 17-Jan-10         | -25.3                               | 8.6                                |
| 21569             | Hanna    | f   | 1     | 1984       | lac        | 1463              | 15            | 4               | 2010           | 21-Feb-10     | 3-Jan-10          | -25.4                               | 8.5                                |
| 21569             | Hanna    | f   | 1     | 1984       | lac        | 1449              | 15            | 4               | 2010           | 21-Feb-10     | 20-Dec-09         | -25.4                               | 8.4                                |
| 21569             | Hanna    | f   | 1     | 1984       | lac        | 1435              | 15            | 4               | 2010           | 21-Feb-10     | 6-Dec-09          | -25.4                               | 8.4                                |
| 21569             | Hanna    | f   | 1     | 1984       | lac        | 1407              | 15            | 4               | 2010           | 21-Feb-10     | 8-Nov-09          | -25.3                               | 8.4                                |
| 21569             | Hanna    | f   | 1     | 1984       | lac        | 1379              | 15            | 4               | 2010           | 21-Feb-10     | 11-Oct-09         | -25.3                               | 8.3                                |
| 21569             | Hanna    | f   | 1     | 1984       | lac        | 1365              | 15            | 4               | 2010           | 21-Feb-10     | 27-Sep-09         | -25.3                               | 8.2                                |
| 21569             | Hanna    | f   | 1     | 1984       | lac        | 1351              | 15            | 4               | 2010           | 21-Feb-10     | 13-Sep-09         | -25.2                               | 8.2                                |
| 21570             | Hanna    | f   | 1     | 1984       | lac        | 1331              | 15            | 4               | 2010           | 22-Feb-10     | 24-Aug-09         | -25.0                               | 8.0                                |
| 21604             | Hanna    | f   | 1     | 1984       | lac        | 1527              | 15            | 4               | 2010           | 22-Mar-10     | 8-Mar-10          | -25.7                               | 8.4                                |
| 21604             | Hanna    | f   | 1     | 1984       | lac        | 1499              | 15            | 4               | 2010           | 22-Mar-10     | 8-Feb-10          | -25.8                               | 8.5                                |
| 21604             | Hanna    | f   | 1     | 1984       | lac        | 1471              | 15            | 4               | 2010           | 22-Mar-10     | 11-Jan-10         | -25.6                               | 8.5                                |
| 21613             | Hanna    | f   | 1     | 1984       | lac        | 1536              | 15            | 4               | 2010           | 31-Mar-10     | 17-Mar-10         | -25.3                               | 8.5                                |
| 21613             | Hanna    | f   | 1     | 1984       | lac        | 1508              | 15            | 4               | 2010           | 31-Mar-10     | 17-Feb-10         | -25.4                               | 8.7                                |
| 21613             | Hanna    | f   | 1     | 1984       | lac        | 1480              | 15            | 4               | 2010           | 31-Mar-10     | 20-Jan-10         | -25.7                               | 8.5                                |
| 13508             | Hanna    | f   | 1     | 1984       | lac        | 1171              | 15            | 4               | 2010           | 14-Apr-09     | 17-Mar-09         | -25.3                               | 8.6                                |
| 13508             | Hanna    | f   | 1     | 1984       | lac        | 1101              | 15            | 4               | 2010           | 14-Apr-09     | 6-Jan-09          | -26.0                               | 8.7                                |
| 13509             | Hanna    | f   | 1     | 1984       | lac        | 1218              | 15            | 4               | 2010           | 31-May-09     | 3-May-09          | -25.6                               | 8.3                                |
| 13510             | Hanna    | f   | 1     | 1984       | lac        | 1223              | 15            | 4               | 2010           | 5-Jun-09      | 8-May-09          | -25.5                               | 8.4                                |
| 21578             | Iris     | f   | 5     | 1984       | preg       | -26               | NA            | NA              | NA             | 3-Mar-10      | 17-Feb-10         | -25.7                               | 8.6                                |
| 21578             | Iris     | f   | 5     | 1984       | preg       | -54               | NA            | NA              | NA             | 3-Mar-10      | 20-Jan-10         | -25.5                               | 8.6                                |
| 21578             | Iris     | f   | 5     | 1984       | preg       | -82               | NA            | NA              | NA             | 3-Mar-10      | 23-Dec-09         | -25.5                               | 8.8                                |
| 21578             | Iris     | f   | 5     | 1984       | preg       | -124              | NA            | NA              | NA             | 3-Mar-10      | 11-Nov-09         | -25.6                               | 8.8                                |
| 21624             | Iris     | f   | 5     | 1984       | lac        | 6                 | NA            | NA              | NA             | 2-May-10      | 21-Mar-10         | -25.7                               | 8.4                                |
| 21624             | Iris     | f   | 5     | 1984       | preg       | -21               | NA            | NA              | NA             | 3-May-10      | 22-Feb-10         | -25.7                               | 8.4                                |
| 21624             | Iris     | f   | 5     | 1984       | preg       | -55               | NA            | NA              | NA             | 4-May-10      | 19-Jan-10         | -25.5                               | 8.2                                |
| 21635             | Iris     | f   | 5     | 1984       | lac        | 40                | NA            | NA              | NA             | 15-May-10     | 24-Apr-10         | -25.7                               | 8.8                                |
| 21635             | Iris     | f   | 5     | 1984       | lac        | 26                | NA            | NA              | NA             | 15-May-10     | 10-Apr-10         | -25.7                               | 8.7                                |
| 21635             | Iris     | f   | 5     | 1984       | lac        | 12                | NA            | NA              | NA             | 15-May-10     | 27-Mar-10         | -25.8                               | 8.8                                |
| 21635             | Iris     | f   | 5     | 1984       | preg       | -2                | NA            | NA              | NA             | 15-May-10     | 13-Mar-10         | -25.7                               | 8.7                                |
| 21635             | Iris     | f   | 5     | 1984       | preg       | -23               | NA            | NA              | NA             | 15-May-10     | 20-Feb-10         | -25.9                               | 8.7                                |
| 21699             | Iris     | f   | 5     | 1984       | lac        | 92                | NA            | NA              | NA             | 29-Jun-10     | 15-Jun-10         | -25.3                               | 8.6                                |
| 21699             | Iris     | f   | 5     | 1984       | lac        | 64                | NA            | NA              | NA             | 29-Jun-10     | 18-May-10         | -25.2                               | 8.7                                |
| 21699             | Iris     | f   | 5     | 1984       | lac        | 36                | NA            | NA              | NA             | 29-Jun-10     | 20-Apr-10         | -25.6                               | 8.8                                |
| 21699             | Iris     | f   | 5     | 1984       | lac        | 8                 | NA            | NA              | NA             | 29-Jun-10     | 23-Mar-10         | -26.0                               | 9.1                                |
| 21699             | Iris     | f   | 5     | 1984       | preg       | -20               | NA            | NA              | NA             | 29-Jun-10     | 23-Feb-10         | -26.4                               | 9.0                                |
| 21713             | Iris     | f   | 5     | 1984       | lac        | 100               | NA            | NA              | NA             | 14-Jul-10     | 23-Jun-10         | -25.5                               | 8.7                                |
| 21713             | Iris     | f   | 5     | 1984       | lac        | 58                | NA            | NA              | NA             | 14-Jul-10     | 12-May-10         | -26.0                               | 9.0                                |
| 21713             | Iris     | f   | 5     | 1984       | lac        | 9                 | NA            | NA              | NA             | 14-Jul-10     | 24-Mar-10         | -25.6                               | 8.6                                |
| 21718             | Iris     | f   | 5     | 1984       | lac        | 120               | NA            | NA              | NA             | 20-Jul-10     | 13-Jul-10         | -25.8                               | 8.9                                |
| 21718             | Iris     | f   | 5     | 1984       | lac        | 106               | NA            | NA              | NA             | 20-Jul-10     | 29-Jun-10         | -25.4                               | 8.8                                |
| 21718             | Iris     | f   | 5     | 1984       | lac        | 92                | NA            | NA              | NA             | 20-Jul-10     | 15-Jun-10         | -25.5                               | 8.8                                |
| 21718             | Iris     | f   | 5     | 1984       | lac        | 78                | NA            | NA              | NA             | 20-Jul-10     | 1-Jun-10          | -25.2                               | 8.6                                |
| 21718             | Iris     | f   | 5     | 1984       | lac        | 64                | NA            | NA              | NA             | 20-Jul-10     | 18-May-10         | -25.0                               | 8.6                                |
| 21718             | Iris     | f   | 5     | 1984       | lac        | 50                | NA            | NA              | NA             | 20-Jul-10     | 4-May-10          | -24.9                               | 8.8                                |
| 21718             | Iris     | f   | 5     | 1984       | lac        | 15                | NA            | NA              | NA             | 20-Jul-10     | 30-Mar-10         | -25.6                               | 8.9                                |
| 21612             | Iris     | f   | 5     | 1984       | lac        | 2                 | NA            | NA              | NA             | 31-Mar-10     | 17-Mar-10         | -25.4                               | 8.8                                |
| 21612             | Iris     | f   | 5     | 1984       | preg       | -26               | NA            | NA              | NA             | 31-Mar-10     | 17-Feb-10         | -25.5                               | 8.8                                |
| 21612             | Iris     | f   | 5     | 1984       | preg       | -54               | NA            | NA              | NA             | 31-Mar-10     | 20-Jan-10         | -25.6                               | 8.7                                |
| 21612             | Iris     | f   | 5     | 1984       | preg       | -82               | NA            | NA              | NA             | 31-Mar-10     | 23-Dec-09         | -25.4                               | 8.6                                |
| 12577             | Iris     | f   | 5     | 1984       | cyc        | -395              | NA            | NA              | NA             | 13-Mar-09     | 13-Feb-09         | -25.9                               | 8.6                                |
| 12577             | Iris     | f   | 5     | 1984       | cyc        | -451              | NA            | NA              | NA             | 13-Mar-09     | 19-Dec-08         | -25.7                               | 8.5                                |
| 21587             | Luna     | f   | 16    | 1999       | cyc        | na                | NA            | NA              | NA             | 8-Mar-10      | 22-Feb-10         | -25.7                               | 8.5                                |
| 21587             | Luna     | f   | 16    | 1999       | cyc        | na                | NA            | NA              | NA             | 8-Mar-10      | 25-Jan-10         | -26.1                               | 8.9                                |
| 21587             | Luna     | f   | 16    | 1999       | cyc        | na                | NA            | NA              | NA             | 8-Mar-10      | 28-Dec-09         | -26.3                               | 8.6                                |
| 21630             | Luna     | f   | 16    | 1999       | cyc        | na                | NA            | NA              | NA             | 8-May-10      | 24-Apr-10         | -25.9                               | 8.9                                |
| 21630             | Luna     | f   | 16    | 1999       | cyc        | na                | NA            | NA              | NA             | 8-May-10      | 27-Mar-10         | -25.8                               | 9.0                                |
| 21630             | Luna     | f   | 16    | 1999       | cyc        | na                | NA            | NA              | NA             | 8-May-10      | 27-Feb-10         | -26.0                               | 8.9                                |
| 21630             | Luna     | f   | 16    | 1999       | cyc        | na                | NA            | NA              | NA             | 8-May-10      | 30-Jan-10         | -25.9                               | 8.6                                |
| 21630             | Luna     | f   | 16    | 1999       | cyc        | na                | NA            | NA              | NA             | 8-May-10      | 5-Dec-09          | -25.5                               | 8.6                                |
| 21641             | Luna     | f   | 16    | 1999       | cyc        | na                | NA            | NA              | NA             | 17-May-10     | 5-Apr-10          | -25.8                               | 8.6                                |
| 21641             | Luna     | f   | 16    | 1999       | cyc        | na                | NA            | NA              | NA             | 17-May-10     | 8-Mar-10          | -26.0                               | 8.7                                |
| 21641             | Luna     | f   | 16    | 1999       | cyc        | na                | NA            | NA              | NA             | 17-May-10     | 11-Jan-10         | -26.2                               | 8.8                                |
| 21625             | Martha   | f   | 3     | 1977       | cyc        | na                | NA            | NA              | NA             | 4-May-10      | 20-Apr-10         | -25.7                               | 8.7                                |
| 21625             | Martha   | f   | 3     | 1977       | cyc        | na                | NA            | NA              | NA             | 4-May-10      | 23-Mar-10         | -25.7                               | 8.8                                |
| 21625             | Martha   | f   | 3     | 1977       | cyc        | na                | NA            | NA              | NA             | 4-May-10      | 23-Feb-10         | -25.7                               | 8.7                                |
| 21625             | Martha   | f   | 3     | 1977       | cyc        | na                | NA            | NA              | NA             | 4-May-10      | 12-Jan-10         | -25.8                               | 8.6                                |
| 21632             | Martha   | f   | 3     | 1977       | cyc        | na                | NA            | NA              | NA             | 13-May-10     | 29-Apr-10         | -25.9                               | 8.9                                |
| 21632             | Martha   | f   | 3     | 1977       | cyc        | na                | NA            | NA              | NA             | 13-May-10     | 1-Apr-10          | -25.7                               | 8.8                                |
| 21632             | Martha   | f   | 3     | 1977       | cyc        | na                | NA            | NA              | NA             | 13-May-10     | 4-Mar-10          | -25.9                               | 8.7                                |
| 21632             | Martha   | f   | 3     | 1977       | cyc        | na                | NA            | NA              | NA             | 13-May-10     | 21-Jan-10         | -25.8                               | 8.5                                |
| 21649             | Martha   | f   | 3     | 1977       | cyc        | na                | NA            | NA              | NA             | 22-May-10     | 15-May-10         | -25.9                               | 8.7                                |
| 21649             | Martha   | f   | 3     | 1977       | cyc        | na                | NA            | NA              | NA             | 22-May-10     | 1-May-10          | -25.7                               | 8.7                                |
| 21649             | Martha   | f   | 3     | 1977       | cyc        | na                | NA            | NA              | NA             | 22-May-10     | 17-Apr-10         | -25.8                               | 8.9                                |
| 21649             | Martha   | f   | 3     | 1977       | cyc        | na                | NA            | NA              | NA             | 22-May-10     | 3-Apr-10          | -26.0                               | 8.8                                |
| 21649             | Martha   | f   | 3     | 1977       | cyc        | na                | NA            | NA              | NA             | 22-May-10     | 20-Mar-10         | -26.0                               | 8.7                                |
| 21649             | Martha   | f   | 3     | 1977       | cyc        | na                | NA            | NA              | NA             | 22-May-10     | 6-Mar-10          | -26.0                               | 8.5                                |
| 21649             | Martha   | f   | 3     | 1977       | cyc        | na                | NA            | NA              | NA             | 22-May-10     | 20-Feb-10         | -26.0                               | 8.5                                |
| 21649             | Martha   | f   | 3     | 1977       | cyc        | na                | NA            | NA              | NA             | 22-May-10     | 6-Feb-10          | -26.0                               | 8.5                                |
| 21661             | Martha   | f   | 3     | 1977       | cyc        | na                | NA            | NA              | NA             | 4-Jun-10      | 14-May-10         | -25.7                               | 8.8                                |
| 21661             | Martha   | f   | 3     | 1977       | cyc        | na                | NA            | NA              | NA             | 4-Jun-10      | 30-Apr-10         | -25.6                               | 8.8                                |
| 21661             | Martha   | f   | 3     | 1977       | cyc        | na                | NA            | NA              | NA             | 4-Jun-10      | 16-Apr-10         | -25.5                               | 8.6                                |
| 21661             | Martha   | f   | 3     | 1977       | cyc        | na                | NA            | NA              | NA             | 4-Jun-10      | 2-Apr-10          | -25.6                               | 8.7                                |
| 21661             | Martha   | f   | 3     | 1977       | cyc        | na                | NA            | NA              | NA             | 4-Jun-10      | 19-Mar-10         | -25.9                               | 8.8                                |
| 21661             | Martha   | f   | 3     | 1977       | cyc        | na                | NA            | NA              | NA             | 4-Jun-10      | 5-Mar-10          | -26.0                               | 8.8                                |
| 21661             | Martha   | f   | 3     | 1977       | cyc        | na                | NA            | NA              | NA             | 4-Jun-10      | 12-Feb-10         | -26.1                               | 8.7                                |
| 21661             | Martha   | f   | 3     | 1977       | cyc        | na                | NA            | NA              | NA             | 4-Jun-10      | 15-Jan-10         | -26.2                               | 8.6                                |
| 13513             | Martha   | f   | 3     | 1977       | cyc        | na                | NA            | NA              | NA             | 26-May-09     | 5-May-09          | -25.7                               | 8.5                                |
| 13513             | Martha   | f   | 3     | 1977       | cyc        | na                | NA            | NA              | NA             | 26-May-09     | 14-Apr-09         | -26.0                               | 8.8                                |
| 21573             | Olga     | f   | 13    | 1984       | lac        | 280               | NA            | NA              | NA             | 26-Feb-10     | 19-Feb-10         | -26.2                               | 8.2                                |
| 21573             | Olga     | f   | 13    | 1984       | lac        | 266               | NA            | NA              | NA             | 26-Feb-10     | 5-Feb-10          | -25.4                               | 9.1                                |
| 21573             | Olga     | f   | 13    | 1984       | lac        | 252               | NA            | NA              | NA             | 26-Feb-10     | 22-Jan-10         | -25.6                               | 9.1                                |
| 21573             | Olga     | f   | 13    | 1984       | lac        | 238               | NA            | NA              |                |               |                   |                                     |                                    |

|       |       |   |    |      |      |      |    |    |    |           |           |       |     |
|-------|-------|---|----|------|------|------|----|----|----|-----------|-----------|-------|-----|
| 21573 | Olga  | f | 13 | 1984 | lac  | 154  | NA | NA | NA | 26-Feb-10 | 16-Oct-09 | -26.0 | 9.0 |
| 21628 | Olga  | f | 13 | 1984 | lac  | 315  | NA | NA | NA | 7-May-10  | 26-Mar-10 | -25.7 | 9.2 |
| 21628 | Olga  | f | 13 | 1984 | lac  | 287  | NA | NA | NA | 7-May-10  | 26-Feb-10 | -25.7 | 9.3 |
| 21714 | Olga  | f | 13 | 1984 | lac  | 413  | NA | NA | NA | 16-Jul-10 | 2-Jul-10  | -25.7 | 9.2 |
| 21714 | Olga  | f | 13 | 1984 | lac  | 385  | NA | NA | NA | 16-Jul-10 | 4-Jun-10  | -26.0 | 9.0 |
| 21714 | Olga  | f | 13 | 1984 | lac  | 357  | NA | NA | NA | 16-Jul-10 | 7-May-10  | -25.6 | 9.1 |
| 13516 | Olga  | f | 13 | 1984 | preg | -13  | NA | NA | NA | 30-May-09 | 2-May-09  | -25.7 | 8.8 |
| 13516 | Olga  | f | 13 | 1984 | preg | -76  | NA | NA | NA | 30-May-09 | 28-Feb-09 | -25.6 | 8.8 |
| 13517 | Olga  | f | 13 | 1984 | lac  | 19   | NA | NA | NA | 17-Jun-09 | 3-Jun-09  | -25.7 | 8.6 |
| 13517 | Olga  | f | 13 | 1984 | preg | -9   | NA | NA | NA | 17-Jun-09 | 6-May-09  | -25.8 | 8.7 |
| 13517 | Olga  | f | 13 | 1984 | preg | -72  | NA | NA | NA | 17-Jun-09 | 4-Mar-09  | -25.5 | 8.6 |
| 13518 | Olga  | f | 13 | 1984 | lac  | 21   | NA | NA | NA | 19-Jun-09 | 5-Jun-09  | -25.2 | 8.7 |
| 13518 | Olga  | f | 13 | 1984 | preg | -7   | NA | NA | NA | 19-Jun-09 | 8-May-09  | -25.6 | 8.5 |
| 13518 | Olga  | f | 13 | 1984 | preg | -35  | NA | NA | NA | 19-Jun-09 | 10-Apr-09 | -25.9 | 8.7 |
| 13518 | Olga  | f | 13 | 1984 | preg | -63  | NA | NA | NA | 19-Jun-09 | 13-Mar-09 | -25.8 | 8.2 |
| 14099 | Olga  | f | 13 | 1984 | lac  | 53   | NA | NA | NA | 28-Jul-09 | 7-Jul-09  | -25.7 | 8.9 |
| 14099 | Olga  | f | 13 | 1984 | lac  | 11   | NA | NA | NA | 28-Jul-09 | 26-May-09 | -26.1 | 8.7 |
| 14099 | Olga  | f | 13 | 1984 | preg | -31  | NA | NA | NA | 28-Jul-09 | 14-Apr-09 | -26.1 | 8.4 |
| 21590 | Paula | f | 6  | 1984 | preg | -111 | NA | NA | NA | 10-Mar-10 | 24-Feb-10 | -25.9 | 8.8 |
| 21590 | Paula | f | 6  | 1984 | preg | -139 | NA | NA | NA | 10-Mar-10 | 27-Jan-10 | -26.0 | 8.8 |
| 21590 | Paula | f | 6  | 1984 | preg | -167 | NA | NA | NA | 10-Mar-10 | 30-Dec-09 | -25.8 | 8.5 |
| 21590 | Paula | f | 6  | 1984 | preg | -209 | NA | NA | NA | 10-Mar-10 | 18-Nov-09 | -25.7 | 8.4 |
| 21605 | Paula | f | 6  | 1984 | preg | -104 | NA | NA | NA | 24-Mar-10 | 3-Mar-10  | -26.1 | 8.9 |
| 21605 | Paula | f | 6  | 1984 | preg | -118 | NA | NA | NA | 24-Mar-10 | 17-Feb-10 | -26.3 | 9.0 |
| 21605 | Paula | f | 6  | 1984 | preg | -132 | NA | NA | NA | 24-Mar-10 | 3-Feb-10  | -26.3 | 8.9 |
| 21605 | Paula | f | 6  | 1984 | preg | -146 | NA | NA | NA | 24-Mar-10 | 20-Jan-10 | -26.4 | 8.9 |
| 21605 | Paula | f | 6  | 1984 | preg | -160 | NA | NA | NA | 24-Mar-10 | 6-Jan-10  | -26.3 | 8.8 |
| 21605 | Paula | f | 6  | 1984 | preg | -174 | NA | NA | NA | 24-Mar-10 | 23-Dec-09 | -26.3 | 8.7 |
| 21605 | Paula | f | 6  | 1984 | preg | -195 | NA | NA | NA | 24-Mar-10 | 2-Dec-09  | -26.3 | 8.5 |
| 21634 | Paula | f | 6  | 1984 | preg | -53  | NA | NA | NA | 14-May-10 | 23-Apr-10 | -25.9 | 9.1 |
| 21634 | Paula | f | 6  | 1984 | preg | -95  | NA | NA | NA | 14-May-10 | 12-Mar-10 | -26.1 | 9.1 |
| 21634 | Paula | f | 6  | 1984 | preg | -144 | NA | NA | NA | 14-May-10 | 22-Jan-10 | -25.8 | 8.9 |
| 21653 | Paula | f | 6  | 1984 | preg | -28  | NA | NA | NA | 25-May-10 | 18-May-10 | -25.8 | 8.7 |
| 21653 | Paula | f | 6  | 1984 | preg | -42  | NA | NA | NA | 25-May-10 | 4-May-10  | -25.8 | 8.7 |
| 21653 | Paula | f | 6  | 1984 | preg | -56  | NA | NA | NA | 25-May-10 | 20-Apr-10 | -25.9 | 8.7 |
| 21653 | Paula | f | 6  | 1984 | preg | -70  | NA | NA | NA | 25-May-10 | 6-Apr-10  | -25.6 | 8.8 |
| 21653 | Paula | f | 6  | 1984 | preg | -84  | NA | NA | NA | 25-May-10 | 23-Mar-10 | -25.7 | 8.9 |
| 21653 | Paula | f | 6  | 1984 | preg | -98  | NA | NA | NA | 25-May-10 | 9-Mar-10  | -26.0 | 8.9 |
| 21653 | Paula | f | 6  | 1984 | preg | -112 | NA | NA | NA | 25-May-10 | 23-Feb-10 | -26.0 | 8.9 |
| 21653 | Paula | f | 6  | 1984 | preg | -126 | NA | NA | NA | 25-May-10 | 9-Feb-10  | -26.2 | 8.9 |
| 21653 | Paula | f | 6  | 1984 | preg | -140 | NA | NA | NA | 25-May-10 | 26-Jan-10 | -26.1 | 9.0 |
| 21653 | Paula | f | 6  | 1984 | preg | -168 | NA | NA | NA | 25-May-10 | 29-Dec-09 | -26.2 | 8.5 |
| 21687 | Paula | f | 6  | 1984 | preg | -10  | NA | NA | NA | 19-Jun-10 | 5-Jun-10  | -25.8 | 9.1 |
| 21687 | Paula | f | 6  | 1984 | preg | -38  | NA | NA | NA | 19-Jun-10 | 8-May-10  | -26.2 | 9.2 |
| 21687 | Paula | f | 6  | 1984 | preg | -87  | NA | NA | NA | 19-Jun-10 | 20-Mar-10 | -25.7 | 8.7 |
| 21707 | Paula | f | 6  | 1984 | lac  | 21   | NA | NA | NA | 13-Jul-10 | 6-Jul-10  | -25.4 | 8.5 |
| 21707 | Paula | f | 6  | 1984 | lac  | 7    | NA | NA | NA | 13-Jul-10 | 22-Jun-10 | -25.4 | 8.7 |
| 21707 | Paula | f | 6  | 1984 | preg | -7   | NA | NA | NA | 13-Jul-10 | 8-Jun-10  | -25.3 | 8.6 |
| 21707 | Paula | f | 6  | 1984 | preg | -21  | NA | NA | NA | 13-Jul-10 | 25-May-10 | -25.6 | 8.7 |
| 21707 | Paula | f | 6  | 1984 | preg | -35  | NA | NA | NA | 13-Jul-10 | 11-May-10 | -25.7 | 8.8 |
| 21707 | Paula | f | 6  | 1984 | preg | -49  | NA | NA | NA | 13-Jul-10 | 27-Apr-10 | -25.8 | 8.9 |
| 21707 | Paula | f | 6  | 1984 | preg | -70  | NA | NA | NA | 13-Jul-10 | 6-Apr-10  | -26.0 | 8.9 |
| 12580 | Paula | f | 6  | 1984 | cyc  | -489 | NA | NA | NA | 11-Mar-09 | 11-Feb-09 | -26.0 | 8.9 |
| 12580 | Paula | f | 6  | 1984 | cyc  | -545 | NA | NA | NA | 11-Mar-09 | 17-Dec-08 | -25.9 | 8.8 |
| 13520 | Paula | f | 6  | 1984 | cyc  | -423 | NA | NA | NA | 16-May-09 | 18-Apr-09 | -25.8 | 8.6 |
| 13520 | Paula | f | 6  | 1984 | cyc  | -500 | NA | NA | NA | 16-May-09 | 31-Jan-09 | -26.0 | 8.9 |
| 13521 | Paula | f | 6  | 1984 | cyc  | -404 | NA | NA | NA | 4-Jun-09  | 7-May-09  | -25.8 | 8.3 |
| 13521 | Paula | f | 6  | 1984 | cyc  | -460 | NA | NA | NA | 4-Jun-09  | 12-Mar-09 | -26.0 | 8.6 |
| 13521 | Paula | f | 6  | 1984 | cyc  | -530 | NA | NA | NA | 4-Jun-09  | 1-Jan-09  | -26.3 | 8.7 |
| 21591 | Polly | f | 22 | 2002 | cyc  | na   | NA | NA | NA | 12-Mar-10 | 26-Feb-10 | -25.6 | 8.8 |
| 21591 | Polly | f | 22 | 2002 | cyc  | na   | NA | NA | NA | 12-Mar-10 | 29-Jan-10 | -25.4 | 8.8 |
| 21591 | Polly | f | 22 | 2002 | cyc  | na   | NA | NA | NA | 12-Mar-10 | 1-Jan-10  | -25.6 | 8.9 |
| 21591 | Polly | f | 22 | 2002 | cyc  | na   | NA | NA | NA | 12-Mar-10 | 4-Dec-09  | -25.9 | 8.7 |
| 21591 | Polly | f | 22 | 2002 | cyc  | na   | NA | NA | NA | 12-Mar-10 | 9-Oct-09  | -26.0 | 8.4 |
| 21620 | Polly | f | 22 | 2002 | cyc  | na   | NA | NA | NA | 15-Apr-10 | 18-Mar-10 | -25.1 | 8.9 |
| 21620 | Polly | f | 22 | 2002 | cyc  | na   | NA | NA | NA | 15-Apr-10 | 21-Jan-10 | -26.2 | 9.4 |
| 21709 | Polly | f | 22 | 2002 | cyc  | na   | NA | NA | NA | 13-Jul-10 | 6-Jul-10  | -25.4 | 9.0 |
| 21709 | Polly | f | 22 | 2002 | cyc  | na   | NA | NA | NA | 13-Jul-10 | 22-Jun-10 | -25.6 | 9.0 |
| 21709 | Polly | f | 22 | 2002 | cyc  | na   | NA | NA | NA | 13-Jul-10 | 8-Jun-10  | -25.4 | 9.0 |
| 21709 | Polly | f | 22 | 2002 | cyc  | na   | NA | NA | NA | 13-Jul-10 | 25-May-10 | -25.7 | 9.1 |
| 21709 | Polly | f | 22 | 2002 | cyc  | na   | NA | NA | NA | 13-Jul-10 | 11-May-10 | -25.7 | 9.1 |
| 21709 | Polly | f | 22 | 2002 | cyc  | na   | NA | NA | NA | 13-Jul-10 | 27-Apr-10 | -25.8 | 9.0 |
| 21709 | Polly | f | 22 | 2002 | cyc  | na   | NA | NA | NA | 13-Jul-10 | 6-Apr-10  | -25.4 | 8.7 |
| 21629 | Rio   | f | 2  | 1984 | cyc  | 1945 | NA | NA | NA | 7-May-10  | 30-Apr-10 | -25.2 | 8.8 |
| 21629 | Rio   | f | 2  | 1984 | cyc  | 1931 | NA | NA | NA | 7-May-10  | 16-Apr-10 | -25.3 | 8.9 |
| 21629 | Rio   | f | 2  | 1984 | cyc  | 1917 | NA | NA | NA | 7-May-10  | 2-Apr-10  | -25.5 | 8.9 |
| 21629 | Rio   | f | 2  | 1984 | cyc  | 1903 | NA | NA | NA | 7-May-10  | 19-Mar-10 | -25.6 | 8.8 |
| 21629 | Rio   | f | 2  | 1984 | cyc  | 1889 | NA | NA | NA | 7-May-10  | 5-Mar-10  | -25.8 | 8.8 |
| 21629 | Rio   | f | 2  | 1984 | cyc  | 1875 | NA | NA | NA | 7-May-10  | 19-Feb-10 | -25.9 | 8.7 |
| 21629 | Rio   | f | 2  | 1984 | cyc  | 1861 | NA | NA | NA | 7-May-10  | 5-Feb-10  | -26.0 | 8.8 |
| 21629 | Rio   | f | 2  | 1984 | cyc  | 1847 | NA | NA | NA | 7-May-10  | 22-Jan-10 | -26.1 | 8.8 |
| 21629 | Rio   | f | 2  | 1984 | cyc  | 1819 | NA | NA | NA | 7-May-10  | 25-Dec-09 | -25.8 | 8.5 |
| 21681 | Rio   | f | 2  | 1984 | cyc  | 1987 | NA | NA | NA | 18-Jun-10 | 11-Jun-10 | -25.1 | 8.7 |
| 21681 | Rio   | f | 2  | 1984 | cyc  | 1973 | NA | NA | NA | 18-Jun-10 | 28-May-10 | -25.2 | 9.0 |
| 21681 | Rio   | f | 2  | 1984 | cyc  | 1959 | NA | NA | NA | 18-Jun-10 | 14-May-10 | -25.3 | 9.0 |
| 21681 | Rio   | f | 2  | 1984 | cyc  | 1945 | NA | NA | NA | 18-Jun-10 | 30-Apr-10 | -25.5 | 8.9 |
| 21681 | Rio   | f | 2  | 1984 | cyc  | 1931 | NA | NA | NA | 18-Jun-10 | 16-Apr-10 | -25.6 | 9.0 |
| 21681 | Rio   | f | 2  | 1984 | cyc  | 1917 | NA | NA | NA | 18-Jun-10 | 2-Apr-10  | -25.8 | 9.1 |
| 21681 | Rio   | f | 2  | 1984 | cyc  | 1903 | NA | NA | NA | 18-Jun-10 | 19-Mar-10 | -25.7 | 9.1 |
| 21681 | Rio   | f | 2  | 1984 | cyc  | 1861 | NA | NA | NA | 18-Jun-10 | 5-Feb-10  | -25.7 | 8.7 |
| 21681 | Rio   | f | 2  | 1984 | cyc  | 1840 | NA | NA | NA | 18-Jun-10 | 15-Jan-10 | -26.1 | 8.5 |
| 21695 | Rio   | f | 2  | 1984 | cyc  | 1988 | NA | NA | NA | 26-Jun-10 | 12-Jun-10 | -25.2 | 9.1 |
| 21695 | Rio   | f | 2  | 1984 | cyc  | 1960 | NA | NA | NA | 26-Jun-10 | 15-May-10 | -26.1 | 9.0 |
| 21695 | Rio   | f | 2  | 1984 | cyc  | 1925 | NA | NA | NA | 26-Jun-10 | 10-Apr-10 | -26.0 | 8.9 |
| 12579 | Rio   | f | 2  | 1984 | lac  | 1522 | NA | NA | NA | 31-Mar-09 | 3-Mar-09  | -25.7 | 8.6 |
| 12579 | Rio   | f | 2  | 1984 | lac  | 1466 | NA | NA | NA | 31-Mar-09 | 6-Jan-09  | -25.9 | 8.8 |
| 13522 | Rio   | f | 2  | 1984 | lac  | 1590 | NA | NA | NA | 7-Jun-09  | 10-May-09 | -25.3 | 8.4 |
| 13522 | Rio   | f | 2  | 1984 | lac  | 1520 | NA | NA | NA | 7-Jun-09  | 1-Mar-09  | -25.2 | 8.5 |
| 21654 | Susi  | f | 15 | 1994 | lac  | 354  | NA | NA | NA | 25-May-10 | 4-May-10  | -25.3 | 9.0 |
| 21654 | Susi  | f | 15 | 1994 | lac  | 340  | NA | NA | NA | 25-May-10 | 20-Apr-10 | -25.4 | 9.1 |
| 21654 | Susi  | f | 15 | 1994 | lac  | 326  | NA | NA | NA | 25-May-10 | 6-Apr-10  | -25.7 | 8.9 |
| 21654 | Susi  | f | 15 | 1994 | lac  | 312  | NA | NA | NA | 25-May-10 | 23-Mar-10 | -25.8 | 9.1 |
| 21654 | Susi  | f | 15 | 1994 | lac  | 298  | NA | NA | NA | 25-May-10 | 9-Mar-10  | -25.8 | 9.0 |
| 21654 | Susi  | f | 15 | 1994 | lac  | 284  | NA | NA | NA | 25-May-10 | 23-Feb-10 | -25.7 | 8.9 |
| 21654 | Susi  | f | 15 | 1994 | lac  | 256  | NA | NA | NA | 25-May-10 | 26-Jan-10 | -25.5 | 9.0 |
| 21696 | Susi  | f | 15 | 1994 | lac  | 387  | NA | NA | NA | 27-Jun-10 | 6-Jun-10  | -24.8 | 9.0 |
| 21696 | Susi  | f | 15 | 1994 | lac  | 345  | NA | NA | NA | 27-Jun-10 | 25-Apr-10 | -25.6 | 9.1 |
| 21627 | Uma   | f | 20 | 1994 | lac  | 623  | NA | NA | NA | 7-May-10  | 30-Apr-10 | -24.7 | 8.7 |
| 21627 | Uma   | f | 20 | 1994 | lac  | 609  | NA | NA | NA | 7-May-10  | 16-Apr-10 | -24.9 | 8.9 |
| 21627 | Uma   | f | 20 | 1994 | lac  | 595  | NA | NA | NA | 7-May-10  | 2-Apr-10  | -25.1 | 8.6 |
| 21627 | Uma   | f | 2  |      |      |      |    |    |    |           |           |       |     |

|       |           |   |    |      |      |      |    |    |      |           |           |       |     |
|-------|-----------|---|----|------|------|------|----|----|------|-----------|-----------|-------|-----|
| 21702 | Uma       | f | 20 | 1994 | lac  | 634  | NA | NA | NA   | 29-Jun-10 | 11-May-10 | -25.1 | 8.7 |
| 21702 | Uma       | f | 20 | 1994 | lac  | 620  | NA | NA | NA   | 29-Jun-10 | 27-Apr-10 | -25.1 | 8.7 |
| 21702 | Uma       | f | 20 | 1994 | lac  | 606  | NA | NA | NA   | 29-Jun-10 | 13-Apr-10 | -25.5 | 8.7 |
| 21702 | Uma       | f | 20 | 1994 | lac  | 592  | NA | NA | NA   | 29-Jun-10 | 30-Mar-10 | -25.6 | 8.7 |
| 21702 | Uma       | f | 20 | 1994 | lac  | 564  | NA | NA | NA   | 29-Jun-10 | 2-Mar-10  | -25.8 | 8.5 |
| 21717 | Uma       | f | 20 | 1994 | lac  | 697  | NA | NA | NA   | 20-Jul-10 | 13-Jul-10 | -25.4 | 8.2 |
| 21717 | Uma       | f | 20 | 1994 | lac  | 683  | NA | NA | NA   | 20-Jul-10 | 29-Jun-10 | -25.2 | 8.2 |
| 21717 | Uma       | f | 20 | 1994 | lac  | 669  | NA | NA | NA   | 20-Jul-10 | 15-Jun-10 | -25.2 | 8.4 |
| 21717 | Uma       | f | 20 | 1994 | lac  | 655  | NA | NA | NA   | 20-Jul-10 | 1-Jun-10  | -25.1 | 8.5 |
| 21717 | Uma       | f | 20 | 1994 | lac  | 641  | NA | NA | NA   | 20-Jul-10 | 18-May-10 | -25.2 | 8.5 |
| 21717 | Uma       | f | 20 | 1994 | lac  | 627  | NA | NA | NA   | 20-Jul-10 | 4-May-10  | -25.2 | 8.6 |
| 21717 | Uma       | f | 20 | 1994 | lac  | 606  | NA | NA | NA   | 20-Jul-10 | 13-Apr-10 | -25.2 | 8.2 |
| 21637 | Uma       | f | 20 | 1994 | lac  | 625  | NA | NA | NA   | 16-May-10 | 2-May-10  | -25.4 | 8.5 |
| 21637 | Uma       | f | 20 | 1994 | lac  | 597  | NA | NA | NA   | 16-May-10 | 4-Apr-10  | -25.5 | 8.6 |
| 21637 | Uma       | f | 20 | 1994 | lac  | 569  | NA | NA | NA   | 16-May-10 | 7-Mar-10  | -26.1 | 8.6 |
| 21683 | Uma       | f | 20 | 1994 | lac  | 666  | NA | NA | NA   | 19-Jun-10 | 12-Jun-10 | -24.9 | 8.1 |
| 21683 | Uma       | f | 20 | 1994 | lac  | 652  | NA | NA | NA   | 19-Jun-10 | 29-May-10 | -24.7 | 8.2 |
| 21683 | Uma       | f | 20 | 1994 | lac  | 638  | NA | NA | NA   | 19-Jun-10 | 15-May-10 | -24.8 | 8.5 |
| 21683 | Uma       | f | 20 | 1994 | lac  | 624  | NA | NA | NA   | 19-Jun-10 | 1-May-10  | -25.0 | 8.7 |
| 21683 | Uma       | f | 20 | 1994 | lac  | 610  | NA | NA | NA   | 19-Jun-10 | 17-Apr-10 | -25.2 | 8.7 |
| 21683 | Uma       | f | 20 | 1994 | lac  | 596  | NA | NA | NA   | 19-Jun-10 | 3-Apr-10  | -25.4 | 8.7 |
| 21683 | Uma       | f | 20 | 1994 | lac  | 582  | NA | NA | NA   | 19-Jun-10 | 20-Mar-10 | -25.5 | 8.7 |
| 21683 | Uma       | f | 20 | 1994 | lac  | 568  | NA | NA | NA   | 19-Jun-10 | 6-Mar-10  | -25.6 | 8.5 |
| 21683 | Uma       | f | 20 | 1994 | lac  | 547  | NA | NA | NA   | 19-Jun-10 | 13-Feb-10 | -25.8 | 8.4 |
| 12578 | Uma       | f | 20 | 1994 | lac  | 187  | NA | NA | NA   | 18-Mar-09 | 18-Feb-09 | -25.9 | 8.6 |
| 13525 | Venus     | f | na | 1999 | na   | na   | NA | NA | NA   | 21-Jun-09 | 24-May-09 | -25.4 | 8.3 |
| 13525 | Venus     | f | na | 1999 | na   | na   | NA | NA | NA   | 21-Jun-09 | 15-Mar-09 | -25.6 | 8.2 |
| 21677 | Wilma     | f | 21 | 1999 | cyc  | -267 | NA | NA | NA   | 14-Jun-10 | 24-May-10 | -25.0 | 8.9 |
| 21677 | Wilma     | f | 21 | 1999 | cyc  | -295 | NA | NA | NA   | 14-Jun-10 | 26-Apr-10 | -24.8 | 8.8 |
| 21677 | Wilma     | f | 21 | 1999 | cyc  | -309 | NA | NA | NA   | 14-Jun-10 | 12-Apr-10 | -24.8 | 8.9 |
| 21677 | Wilma     | f | 21 | 1999 | cyc  | -323 | NA | NA | NA   | 14-Jun-10 | 29-Mar-10 | -25.1 | 8.9 |
| 21677 | Wilma     | f | 21 | 1999 | cyc  | -337 | NA | NA | NA   | 14-Jun-10 | 15-Mar-10 | -25.3 | 9.1 |
| 21677 | Wilma     | f | 21 | 1999 | cyc  | -351 | NA | NA | NA   | 14-Jun-10 | 1-Mar-10  | -25.7 | 9.1 |
| 21677 | Wilma     | f | 21 | 1999 | cyc  | -365 | NA | NA | NA   | 14-Jun-10 | 15-Feb-10 | -25.9 | 9.3 |
| 21677 | Wilma     | f | 21 | 1999 | cyc  | -379 | NA | NA | NA   | 14-Jun-10 | 1-Feb-10  | -26.1 | 9.1 |
| 21710 | Wilma     | f | 21 | 1999 | cyc  | -237 | NA | NA | NA   | 14-Jul-10 | 23-Jun-10 | -25.6 | 9.6 |
| 21710 | Wilma     | f | 21 | 1999 | cyc  | -251 | NA | NA | NA   | 14-Jul-10 | 9-Jun-10  | -25.3 | 8.9 |
| 21710 | Wilma     | f | 21 | 1999 | cyc  | -265 | NA | NA | NA   | 14-Jul-10 | 26-May-10 | -25.2 | 9.0 |
| 21710 | Wilma     | f | 21 | 1999 | cyc  | -279 | NA | NA | NA   | 14-Jul-10 | 12-May-10 | -25.2 | 8.9 |
| 21710 | Wilma     | f | 21 | 1999 | cyc  | -293 | NA | NA | NA   | 14-Jul-10 | 28-Apr-10 | -25.2 | 9.1 |
| 21710 | Wilma     | f | 21 | 1999 | cyc  | -307 | NA | NA | NA   | 14-Jul-10 | 14-Apr-10 | -25.3 | 9.2 |
| 21710 | Wilma     | f | 21 | 1999 | cyc  | -321 | NA | NA | NA   | 14-Jul-10 | 31-Mar-10 | -25.3 | 9.2 |
| 21600 | Zoe       | f | 9  | 1984 | preg | -105 | NA | NA | NA   | 16-Mar-10 | 2-Mar-10  | -25.8 | 8.8 |
| 21600 | Zoe       | f | 9  | 1984 | preg | -133 | NA | NA | NA   | 16-Mar-10 | 2-Feb-10  | -25.7 | 8.7 |
| 21600 | Zoe       | f | 9  | 1984 | preg | -154 | NA | NA | NA   | 16-Mar-10 | 12-Jan-10 | -25.7 | 8.7 |
| 21600 | Zoe       | f | 9  | 1984 | preg | -168 | NA | NA | NA   | 16-Mar-10 | 29-Dec-09 | -25.8 | 8.8 |
| 21600 | Zoe       | f | 9  | 1984 | preg | -182 | NA | NA | NA   | 16-Mar-10 | 15-Dec-09 | -25.9 | 8.5 |
| 21600 | Zoe       | f | 9  | 1984 | preg | -210 | NA | NA | NA   | 16-Mar-10 | 17-Nov-09 | -25.8 | 8.5 |
| 21645 | Zoe       | f | 9  | 1984 | preg | -47  | NA | NA | NA   | 20-May-10 | 29-Apr-10 | -25.3 | 9.2 |
| 21645 | Zoe       | f | 9  | 1984 | preg | -61  | NA | NA | NA   | 20-May-10 | 15-Apr-10 | -25.3 | 9.3 |
| 21645 | Zoe       | f | 9  | 1984 | preg | -75  | NA | NA | NA   | 20-May-10 | 1-Apr-10  | -25.5 | 9.3 |
| 21645 | Zoe       | f | 9  | 1984 | preg | -89  | NA | NA | NA   | 20-May-10 | 18-Mar-10 | -25.8 | 9.3 |
| 21645 | Zoe       | f | 9  | 1984 | preg | -103 | NA | NA | NA   | 20-May-10 | 4-Mar-10  | -25.9 | 9.2 |
| 21645 | Zoe       | f | 9  | 1984 | preg | -138 | NA | NA | NA   | 20-May-10 | 28-Jan-10 | -26.0 | 9.2 |
| 21722 | Zoe       | f | 9  | 1984 | lac  | 22   | NA | NA | NA   | 21-Jul-10 | 7-Jul-10  | -25.3 | 8.6 |
| 21722 | Zoe       | f | 9  | 1984 | preg | -6   | NA | NA | NA   | 21-Jul-10 | 9-Jun-10  | -25.5 | 8.6 |
| 21722 | Zoe       | f | 9  | 1984 | preg | -34  | NA | NA | NA   | 21-Jul-10 | 12-May-10 | -25.4 | 8.5 |
| 21722 | Zoe       | f | 9  | 1984 | preg | -76  | NA | NA | NA   | 21-Jul-10 | 31-Mar-10 | -26.0 | 8.7 |
| 21722 | Zoe       | f | 9  | 1984 | preg | -132 | NA | NA | NA   | 21-Jul-10 | 3-Feb-10  | -26.5 | 8.5 |
| 13527 | Zoe       | f | 9  | 1984 | cyc  | -392 | NA | NA | NA   | 16-Jun-09 | 19-May-09 | -25.5 | 8.1 |
| 13527 | Zoe       | f | 9  | 1984 | cyc  | -469 | NA | NA | NA   | 16-Jun-09 | 3-Mar-09  | -25.7 | 8.4 |
| 14096 | Zoe       | f | 9  | 1984 | cyc  | -381 | NA | NA | NA   | 4-Jul-09  | 30-May-09 | -25.9 | 8.2 |
| 14096 | Zoe       | f | 9  | 1984 | cyc  | -465 | NA | NA | NA   | 4-Jul-09  | 7-Mar-09  | -25.8 | 8.3 |
| 12573 | Apollo    | m | 17 | 1999 | na   | na   | 15 | 3  | 2010 | 6-Mar-09  | 20-Feb-09 | -25.7 | 7.8 |
| 12573 | Apollo    | m | 17 | 1999 | na   | na   | 15 | 3  | 2010 | 6-Mar-09  | 23-Jan-09 | -25.8 | 8.0 |
| 12573 | Apollo    | m | 17 | 1999 | na   | na   | 15 | 3  | 2010 | 6-Mar-09  | 28-Nov-08 | -25.8 | 8.0 |
| 13529 | Apollo    | m | 17 | 1999 | na   | na   | 15 | 3  | 2010 | 29-May-09 | 15-May-09 | -25.6 | 8.1 |
| 21598 | Ben       | m | 12 | 1994 | na   | na   | NA | NA | NA   | 14-Mar-10 | 28-Feb-10 | -25.7 | 8.9 |
| 21598 | Ben       | m | 12 | 1994 | na   | na   | NA | NA | NA   | 14-Mar-10 | 31-Jan-10 | -25.9 | 8.9 |
| 21598 | Ben       | m | 12 | 1994 | na   | na   | NA | NA | NA   | 14-Mar-10 | 3-Jan-10  | -25.8 | 8.8 |
| 21598 | Ben       | m | 12 | 1994 | na   | na   | NA | NA | NA   | 14-Mar-10 | 6-Dec-09  | -25.6 | 8.6 |
| 21598 | Ben       | m | 12 | 1994 | na   | na   | NA | NA | NA   | 14-Mar-10 | 1-Nov-09  | -25.6 | 8.5 |
| 21603 | Ben       | m | 12 | 1994 | na   | na   | NA | NA | NA   | 20-Mar-10 | 6-Mar-10  | -25.7 | 8.9 |
| 21603 | Ben       | m | 12 | 1994 | na   | na   | NA | NA | NA   | 20-Mar-10 | 6-Feb-10  | -25.7 | 8.9 |
| 21603 | Ben       | m | 12 | 1994 | na   | na   | NA | NA | NA   | 20-Mar-10 | 9-Jan-10  | -25.6 | 8.6 |
| 21607 | Ben       | m | 12 | 1994 | na   | na   | NA | NA | NA   | 26-Mar-10 | 5-Mar-10  | -25.8 | 8.9 |
| 21607 | Ben       | m | 12 | 1994 | na   | na   | NA | NA | NA   | 26-Mar-10 | 19-Feb-10 | -25.7 | 8.9 |
| 21607 | Ben       | m | 12 | 1994 | na   | na   | NA | NA | NA   | 26-Mar-10 | 5-Feb-10  | -25.7 | 8.8 |
| 21607 | Ben       | m | 12 | 1994 | na   | na   | NA | NA | NA   | 26-Mar-10 | 22-Jan-10 | -25.7 | 8.8 |
| 21607 | Ben       | m | 12 | 1994 | na   | na   | NA | NA | NA   | 26-Mar-10 | 8-Jan-10  | -25.9 | 8.8 |
| 21607 | Ben       | m | 12 | 1994 | na   | na   | NA | NA | NA   | 26-Mar-10 | 25-Dec-09 | -25.7 | 8.7 |
| 21607 | Ben       | m | 12 | 1994 | na   | na   | NA | NA | NA   | 26-Mar-10 | 11-Dec-09 | -25.9 | 8.6 |
| 21607 | Ben       | m | 12 | 1994 | na   | na   | NA | NA | NA   | 26-Mar-10 | 20-Nov-09 | -25.7 | 8.5 |
| 21618 | Ben       | m | 12 | 1994 | na   | na   | NA | NA | NA   | 7-Apr-10  | 31-Mar-10 | -25.9 | 9.0 |
| 21618 | Ben       | m | 12 | 1994 | na   | na   | NA | NA | NA   | 7-Apr-10  | 17-Mar-10 | -25.6 | 8.9 |
| 21618 | Ben       | m | 12 | 1994 | na   | na   | NA | NA | NA   | 7-Apr-10  | 3-Mar-10  | -25.7 | 8.9 |
| 21618 | Ben       | m | 12 | 1994 | na   | na   | NA | NA | NA   | 7-Apr-10  | 17-Feb-10 | -25.6 | 8.8 |
| 21618 | Ben       | m | 12 | 1994 | na   | na   | NA | NA | NA   | 7-Apr-10  | 3-Feb-10  | -26.3 | 8.8 |
| 21618 | Ben       | m | 12 | 1994 | na   | na   | NA | NA | NA   | 7-Apr-10  | 20-Jan-10 | -26.1 | 8.7 |
| 21618 | Ben       | m | 12 | 1994 | na   | na   | NA | NA | NA   | 7-Apr-10  | 6-Jan-10  | -25.9 | 8.6 |
| 21618 | Ben       | m | 12 | 1994 | na   | na   | NA | NA | NA   | 7-Apr-10  | 23-Dec-09 | -25.6 | 8.3 |
| 21618 | Ben       | m | 12 | 1994 | na   | na   | NA | NA | NA   | 7-Apr-10  | 9-Dec-09  | -25.6 | 8.1 |
| 21638 | Ben       | m | 12 | 1994 | na   | na   | NA | NA | NA   | 16-May-10 | 2-May-10  | -25.9 | 9.0 |
| 21638 | Ben       | m | 12 | 1994 | na   | na   | NA | NA | NA   | 16-May-10 | 4-Apr-10  | -26.2 | 8.9 |
| 21638 | Ben       | m | 12 | 1994 | na   | na   | NA | NA | NA   | 16-May-10 | 7-Mar-10  | -26.1 | 8.8 |
| 21638 | Ben       | m | 12 | 1994 | na   | na   | NA | NA | NA   | 16-May-10 | 7-Feb-10  | -26.1 | 8.8 |
| 21638 | Ben       | m | 12 | 1994 | na   | na   | NA | NA | NA   | 16-May-10 | 10-Jan-10 | -25.8 | 8.6 |
| 21703 | Ben       | m | 12 | 1994 | na   | na   | NA | NA | NA   | 26-Jun-10 | 19-Jun-10 | -25.3 | 8.9 |
| 21703 | Ben       | m | 12 | 1994 | na   | na   | NA | NA | NA   | 27-Jun-10 | 6-Jun-10  | -25.5 | 9.0 |
| 21703 | Ben       | m | 12 | 1994 | na   | na   | NA | NA | NA   | 28-Jun-10 | 24-May-10 | -25.6 | 8.9 |
| 21703 | Ben       | m | 12 | 1994 | na   | na   | NA | NA | NA   | 29-Jun-10 | 11-May-10 | -25.8 | 8.9 |
| 21703 | Ben       | m | 12 | 1994 | na   | na   | NA | NA | NA   | 30-Jun-10 | 28-Apr-10 | -25.7 | 8.8 |
| 21703 | Ben       | m | 12 | 1994 | na   | na   | NA | NA | NA   | 1-Jul-10  | 15-Apr-10 | -25.8 | 8.8 |
| 21703 | Ben       | m | 12 | 1994 | na   | na   | NA | NA | NA   | 2-Jul-10  | 26-Mar-10 | -25.9 | 8.8 |
| 13530 | Ben       | m | 12 | 1994 | na   | na   | NA | NA | NA   | 1-May-09  | 3-Apr-09  | -25.6 | 8.5 |
| 13530 | Ben       | m | 12 | 1994 | na   | na   | NA | NA | NA   | 1-May-09  | 23-Jan-09 | -25.9 | 8.5 |
| 13531 | Ben       | m | 12 | 1994 | na   | na   | NA | NA | NA   | 10-Jun-09 | 13-May-09 | -25.7 | 8.3 |
| 13531 | Ben       | m | 12 | 1994 | na   | na   | NA | NA | NA   | 10-Jun-09 | 18-Mar-09 | -25.4 | 8.4 |
| 13532 | Cammlillo | m | 7  | 1992 | na   | na   | NA | NA | NA   | 5-Apr-09  | 22-Mar-09 | -25.9 | 8.8 |
| 13532 | Cammlillo | m | 7  | 1992 | na   | na   | NA | NA | NA   | 5-Apr-09  | 22-Feb-09 | -25.9 | 8.8 |
| 13532 | Cammlillo | m | 7  | 1992 | na   | na   | NA | NA | NA   | 5         |           |       |     |

|       |          |   |    |      |    |    |    |    |      |           |           |       |     |
|-------|----------|---|----|------|----|----|----|----|------|-----------|-----------|-------|-----|
| 14101 | Cammlilo | m | 7  | 1992 | na | na | NA | NA | NA   | 15-Jul-09 | 11-Mar-09 | -25.7 | 8.3 |
| 21644 | Cammlilo | m | 7  | 1992 | na | na | NA | NA | NA   | 19-May-10 | 12-May-10 | -25.0 | 8.6 |
| 21644 | Cammlilo | m | 7  | 1992 | na | na | NA | NA | NA   | 19-May-10 | 28-Apr-10 | -24.9 | 8.8 |
| 21644 | Cammlilo | m | 7  | 1992 | na | na | NA | NA | NA   | 19-May-10 | 14-Apr-10 | -25.3 | 8.8 |
| 21644 | Cammlilo | m | 7  | 1992 | na | na | NA | NA | NA   | 19-May-10 | 31-Mar-10 | -25.5 | 9.4 |
| 21644 | Cammlilo | m | 7  | 1992 | na | na | NA | NA | NA   | 19-May-10 | 17-Mar-10 | -25.7 | 8.5 |
| 21644 | Cammlilo | m | 7  | 1992 | na | na | NA | NA | NA   | 19-May-10 | 3-Mar-10  | -25.8 | 9.0 |
| 21644 | Cammlilo | m | 7  | 1992 | na | na | NA | NA | NA   | 19-May-10 | 10-Feb-10 | -25.9 | 8.4 |
| 21608 | Cammlilo | m | 7  | 1992 | na | na | NA | NA | NA   | 26-Mar-10 | 12-Mar-10 | -25.4 | 8.8 |
| 21608 | Cammlilo | m | 7  | 1992 | na | na | NA | NA | NA   | 26-Mar-10 | 12-Feb-10 | -25.7 | 8.5 |
| 21608 | Cammlilo | m | 7  | 1992 | na | na | NA | NA | NA   | 26-Mar-10 | 15-Jan-10 | -25.7 | 8.6 |
| 21711 | Cammlilo | m | 7  | 1992 | na | na | NA | NA | NA   | 14-Jul-10 | 23-Jun-10 | -25.5 | 8.8 |
| 21711 | Cammlilo | m | 7  | 1992 | na | na | NA | NA | NA   | 14-Jul-10 | 9-Jun-10  | -25.5 | 8.8 |
| 21711 | Cammlilo | m | 7  | 1992 | na | na | NA | NA | NA   | 14-Jul-10 | 26-May-10 | -25.5 | 8.8 |
| 21711 | Cammlilo | m | 7  | 1992 | na | na | NA | NA | NA   | 14-Jul-10 | 28-Apr-10 | -25.5 | 9.1 |
| 21711 | Cammlilo | m | 7  | 1992 | na | na | NA | NA | NA   | 14-Jul-10 | 14-Apr-10 | -25.4 | 8.9 |
| 21711 | Cammlilo | m | 7  | 1992 | na | na | NA | NA | NA   | 14-Jul-10 | 31-Mar-10 | -25.1 | 8.8 |
| 21711 | Cammlilo | m | 7  | 1992 | na | na | NA | NA | NA   | 14-Jul-10 | 3-Mar-10  | -25.1 | 8.7 |
| 21650 | Cammlilo | m | 7  | 1992 | na | na | NA | NA | NA   | 22-May-10 | 8-May-10  | -25.6 | 9.0 |
| 21650 | Cammlilo | m | 7  | 1992 | na | na | NA | NA | NA   | 22-May-10 | 10-Apr-10 | -25.9 | 9.0 |
| 21650 | Cammlilo | m | 7  | 1992 | na | na | NA | NA | NA   | 22-May-10 | 13-Mar-10 | -25.9 | 8.8 |
| 21650 | Cammlilo | m | 7  | 1992 | na | na | NA | NA | NA   | 22-May-10 | 23-Jan-10 | -25.9 | 8.8 |
| 21660 | Cammlilo | m | 7  | 1992 | na | na | NA | NA | NA   | 4-Jun-10  | 21-May-10 | -25.3 | 9.1 |
| 21660 | Cammlilo | m | 7  | 1992 | na | na | NA | NA | NA   | 4-Jun-10  | 23-Apr-10 | -25.7 | 8.9 |
| 21660 | Cammlilo | m | 7  | 1992 | na | na | NA | NA | NA   | 4-Jun-10  | 26-Mar-10 | -26.0 | 9.1 |
| 21660 | Cammlilo | m | 7  | 1992 | na | na | NA | NA | NA   | 4-Jun-10  | 12-Feb-10 | -25.8 | 8.7 |
| 13533 | Dante    | m | 11 | 1984 | na | na | 15 | 7  | 2010 | 12-Apr-09 | 29-Mar-09 | -25.8 | 8.4 |
| 13533 | Dante    | m | 11 | 1984 | na | na | 15 | 7  | 2010 | 12-Apr-09 | 1-Mar-09  | -26.0 | 8.6 |
| 13533 | Dante    | m | 11 | 1984 | na | na | 15 | 7  | 2010 | 12-Apr-09 | 4-Jan-09  | -26.0 | 9.1 |
| 13534 | Dante    | m | 11 | 1984 | na | na | 15 | 7  | 2010 | 27-May-09 | 22-Apr-09 | -25.6 | 8.9 |
| 13534 | Dante    | m | 11 | 1984 | na | na | 15 | 7  | 2010 | 27-May-09 | 28-Jan-09 | -25.3 | 8.9 |
| 21602 | Emil     | m | 19 | 1998 | na | na | NA | NA | NA   | 17-Mar-10 | 3-Mar-10  | -25.8 | 8.6 |
| 21602 | Emil     | m | 19 | 1998 | na | na | NA | NA | NA   | 17-Mar-10 | 3-Feb-10  | -25.7 | 8.7 |
| 21602 | Emil     | m | 19 | 1998 | na | na | NA | NA | NA   | 17-Mar-10 | 6-Jan-10  | -25.7 | 8.7 |
| 21619 | Emil     | m | 19 | 1998 | na | na | NA | NA | NA   | 8-Apr-10  | 18-Mar-10 | -26.3 | 8.6 |
| 21619 | Emil     | m | 19 | 1998 | na | na | NA | NA | NA   | 8-Apr-10  | 4-Mar-10  | -26.2 | 8.6 |
| 21619 | Emil     | m | 19 | 1998 | na | na | NA | NA | NA   | 8-Apr-10  | 18-Feb-10 | -26.0 | 8.5 |
| 21619 | Emil     | m | 19 | 1998 | na | na | NA | NA | NA   | 8-Apr-10  | 4-Feb-10  | -25.8 | 8.7 |
| 21619 | Emil     | m | 19 | 1998 | na | na | NA | NA | NA   | 8-Apr-10  | 21-Jan-10 | -25.8 | 8.7 |
| 21619 | Emil     | m | 19 | 1998 | na | na | NA | NA | NA   | 8-Apr-10  | 31-Dec-09 | -25.9 | 8.8 |
| 13536 | Emil     | m | 19 | 1998 | na | na | NA | NA | NA   | 22-Apr-09 | 18-Mar-09 | -25.5 | 8.4 |
| 13536 | Emil     | m | 19 | 1998 | na | na | NA | NA | NA   | 22-Apr-09 | 7-Jan-09  | -25.8 | 8.6 |
| 13535 | Emil     | m | 19 | 1998 | na | na | NA | NA | NA   | 5-Apr-09  | 29-Mar-09 | -25.6 | 8.2 |
| 13535 | Emil     | m | 19 | 1998 | na | na | NA | NA | NA   | 5-Apr-09  | 15-Mar-09 | -25.7 | 8.1 |
| 13535 | Emil     | m | 19 | 1998 | na | na | NA | NA | NA   | 5-Apr-09  | 1-Mar-09  | -25.8 | 8.2 |
| 13535 | Emil     | m | 19 | 1998 | na | na | NA | NA | NA   | 5-Apr-09  | 1-Mar-09  | -26.2 | 8.4 |
| 13535 | Emil     | m | 19 | 1998 | na | na | NA | NA | NA   | 5-Apr-09  | 1-Feb-09  | -26.2 | 8.5 |
| 21616 | Jack     | m | 10 | 1987 | na | na | NA | NA | NA   | 6-Apr-10  | 16-Mar-10 | -25.8 | 8.8 |
| 21616 | Jack     | m | 10 | 1987 | na | na | NA | NA | NA   | 6-Apr-10  | 2-Mar-10  | -25.7 | 8.7 |
| 21616 | Jack     | m | 10 | 1987 | na | na | NA | NA | NA   | 6-Apr-10  | 16-Feb-10 | -25.6 | 9.3 |
| 21616 | Jack     | m | 10 | 1987 | na | na | NA | NA | NA   | 6-Apr-10  | 26-Jan-10 | -25.9 | 8.9 |
| 21616 | Jack     | m | 10 | 1987 | na | na | NA | NA | NA   | 6-Apr-10  | 22-Dec-09 | -26.0 | 8.9 |
| 21636 | Jack     | m | 10 | 1987 | na | na | NA | NA | NA   | 16-May-10 | 9-May-10  | -26.0 | 8.9 |
| 21636 | Jack     | m | 10 | 1987 | na | na | NA | NA | NA   | 16-May-10 | 25-Apr-10 | -25.9 | 9.0 |
| 21636 | Jack     | m | 10 | 1987 | na | na | NA | NA | NA   | 16-May-10 | 11-Apr-10 | -25.7 | 8.9 |
| 21636 | Jack     | m | 10 | 1987 | na | na | NA | NA | NA   | 16-May-10 | 28-Mar-10 | -25.9 | 8.9 |
| 21636 | Jack     | m | 10 | 1987 | na | na | NA | NA | NA   | 16-May-10 | 14-Mar-10 | -25.9 | 8.7 |
| 21636 | Jack     | m | 10 | 1987 | na | na | NA | NA | NA   | 16-May-10 | 28-Feb-10 | -25.6 | 8.8 |
| 21636 | Jack     | m | 10 | 1987 | na | na | NA | NA | NA   | 16-May-10 | 14-Feb-10 | -25.3 | 8.6 |
| 21636 | Jack     | m | 10 | 1987 | na | na | NA | NA | NA   | 16-May-10 | 31-Jan-10 | -25.2 | 8.5 |
| 21636 | Jack     | m | 10 | 1987 | na | na | NA | NA | NA   | 16-May-10 | 17-Jan-10 | -25.1 | 8.7 |
| 21636 | Jack     | m | 10 | 1987 | na | na | NA | NA | NA   | 16-May-10 | 3-Jan-10  | -25.1 | 8.6 |
| 21636 | Jack     | m | 10 | 1987 | na | na | NA | NA | NA   | 16-May-10 | 13-Dec-09 | -25.3 | 8.5 |
| 21636 | Jack     | m | 10 | 1987 | na | na | NA | NA | NA   | 16-May-10 | 15-Nov-09 | -25.0 | 8.5 |
| 21665 | Jack     | m | 10 | 1987 | na | na | NA | NA | NA   | 6-Jun-10  | 23-May-10 | -25.1 | 8.7 |
| 21665 | Jack     | m | 10 | 1987 | na | na | NA | NA | NA   | 6-Jun-10  | 25-Apr-10 | -24.9 | 8.6 |
| 21665 | Jack     | m | 10 | 1987 | na | na | NA | NA | NA   | 6-Jun-10  | 28-Mar-10 | -24.8 | 8.5 |
| 21665 | Jack     | m | 10 | 1987 | na | na | NA | NA | NA   | 6-Jun-10  | 28-Feb-10 | -24.7 | 8.6 |
| 21665 | Jack     | m | 10 | 1987 | na | na | NA | NA | NA   | 6-Jun-10  | 17-Jan-10 | -24.8 | 8.6 |
| 13537 | Jack     | m | 10 | 1987 | na | na | NA | NA | NA   | 6-Jun-09  | 9-May-09  | -25.3 | 8.3 |
| 13537 | Jack     | m | 10 | 1987 | na | na | NA | NA | NA   | 6-Jun-09  | 14-Feb-09 | -25.8 | 8.3 |
| 13538 | Max      | m | 23 | 1999 | na | na | 15 | 3  | 2010 | 13-Apr-09 | 3-Apr-09  | -25.5 | 7.7 |
| 13538 | Max      | m | 23 | 1999 | na | na | 15 | 3  | 2010 | 13-Apr-09 | 12-Mar-09 | -25.6 | 7.8 |
| 13538 | Max      | m | 23 | 1999 | na | na | 15 | 3  | 2010 | 13-Apr-09 | 16-Feb-09 | -25.8 | 7.8 |
| 13538 | Max      | m | 23 | 1999 | na | na | 15 | 3  | 2010 | 13-Apr-09 | 19-Jan-09 | -26.0 | 8.0 |
| 13538 | Max      | m | 23 | 1999 | na | na | 15 | 3  | 2010 | 13-Apr-09 | 15-Dec-08 | -26.3 | 8.1 |
| 13539 | Pan      | m | 18 | 1998 | na | na | 15 | 3  | 2010 | 8-Jun-09  | 4-May-09  | -25.3 | 8.2 |
| 13539 | Pan      | m | 18 | 1998 | na | na | 15 | 3  | 2010 | 8-Jun-09  | 23-Feb-09 | -25.4 | 8.1 |
| 13540 | Tito     | m | 8  | 1989 | na | na | 7  | 7  | 2009 | 11-Apr-09 | 7-Mar-09  | -25.5 | 8.5 |
| 13540 | Tito     | m | 8  | 1989 | na | na | 7  | 7  | 2009 | 11-Apr-09 | 27-Dec-08 | -25.6 | 8.4 |
| 13541 | Tito     | m | 8  | 1989 | na | na | 7  | 7  | 2009 | 14-May-09 | 30-Apr-09 | -25.4 | 8.5 |
| 13541 | Tito     | m | 8  | 1989 | na | na | 7  | 7  | 2009 | 14-May-09 | 2-Apr-09  | -25.7 | 8.5 |
| 13541 | Tito     | m | 8  | 1989 | na | na | 7  | 7  | 2009 | 14-May-09 | 5-Mar-09  | -25.9 | 8.5 |
| 13541 | Tito     | m | 8  | 1989 | na | na | 7  | 7  | 2009 | 14-May-09 | 22-Jan-09 | -26.0 | 8.5 |
| 13542 | Tito     | m | 8  | 1989 | na | na | 7  | 7  | 2009 | 17-Jun-09 | 3-Jun-09  | -25.3 | 8.6 |
| 13542 | Tito     | m | 8  | 1989 | na | na | 7  | 7  | 2009 | 17-Jun-09 | 6-May-09  | -25.5 | 8.5 |
| 13542 | Tito     | m | 8  | 1989 | na | na | 7  | 7  | 2009 | 17-Jun-09 | 8-Apr-09  | -25.7 | 8.4 |
| 13542 | Tito     | m | 8  | 1989 | na | na | 7  | 7  | 2009 | 17-Jun-09 | 11-Mar-09 | -25.9 | 8.4 |
| 13542 | Tito     | m | 8  | 1989 | na | na | 7  | 7  | 2009 | 17-Jun-09 | 11-Feb-09 | -26.1 | 8.3 |
