# Supplementary material for: The Steady State Great Ape? Long Term Isotopic Records Reveal the Effects of Season, Social Rank and Reproductive Status on Bonobo Feeding Behavior
Source: PubMed Central journal article supplement (PMC5023189; doi:10.1371/journal.pone.0162091), 2016-09-14
Supplement: pone.0162091.s004.pdf [file pone.0162091.s004.pdf]

| species                            | family           | tpy   | ppu    | food?               | $\delta^{13}\text{C}\%$<br>vPDB | $\delta^{15}\text{N}\%$<br>AIR | %C   | %N  | atomic<br>C:N | %protein<br>(dry mass) | %protein (dry<br>mass)* |
|------------------------------------|------------------|-------|--------|---------------------|---------------------------------|--------------------------------|------|-----|---------------|------------------------|-------------------------|
| <i>Haumania leonardiana</i>        | Marantaceae      | herb  | pith   | food                | -33.7                           | 4.9                            | 49.5 | 3.4 | 16.8          | 21.4                   | na                      |
| <i>Haumania liebrechtsiana</i>     | Marantaceae      | herb  | leaf   | food                | -38.8                           | 6.1                            | 46.6 | 3.0 | 18.0          | 18.9                   | 20.12                   |
| <i>Haumania liebrechtsiana</i>     | Marantaceae      | herb  | leaf   | food                | -33.7                           | 6.4                            | 46.6 | 3.0 | 18.1          | 18.8                   | 20.12                   |
| <i>Haumania liebrechtsiana</i>     | Marantaceae      | herb  | pith   | food                | -33.2                           | 6.4                            | 43.5 | 6.0 | 8.5           | 37.2                   | 30.74                   |
| <i>Marantochloa purpurea</i>       | Marantaceae      | herb  | leaves | food                | -34.2                           | 6.8                            | 42.6 | 2.4 | 20.6          | 15.1                   | 17.06                   |
| <i>Sarcophrynium schweinfurth.</i> | Marantaceae      | herb  | leaves | food                | -36.2                           | 3.7                            | 50.7 | 1.9 | 30.6          | 12.1                   | 12.47                   |
| Unidentified                       | Unidentified     | herb  | root   | food                | -28.7                           | 3.0                            | 49.3 | 1.1 | 52.9          | 6.8                    | na                      |
| Unidentified                       | Marantaceae      | herb  | fruit  | non-food            | -31.0                           | 5.6                            | 42.1 | 1.4 | 34.3          | 8.9                    | na                      |
|                                    |                  |       |        | mean                | -33.7                           | 5.4                            | 46.4 | 2.8 | 25.0          | 17.4                   | 20.1                    |
|                                    |                  |       |        | 1 $\sigma$          | 3.0                             | 1.4                            | 3.3  | 1.5 | 13.9          | 9.5                    | 6.7                     |
| <i>Chytranthus gillettii</i>       | Sapindaceae      | shrub | seed   | food                | -32.3                           | 2.8                            | 43.7 | 1.6 | 31.4          | 10.2                   | na                      |
| <i>Cola bruneellii</i>             | Sterculiaceae    | shrub | fruit  | food                | -37.8                           | 5.9                            | 45.3 | 3.0 | 17.4          | 19.0                   | na                      |
| <i>Cola bruneellii</i>             | Sterculiaceae    | shrub | leaves | food                | -33.3                           | 5.1                            | 47.0 | 3.4 | 16.3          | 21.1                   | na                      |
| <i>Rothmannia macrocarpa</i>       | Rubiaceae        | shrub | fruit  | non-food            | -31.5                           | 6.9                            | 44.7 | 1.5 | 35.8          | 9.1                    | na                      |
|                                    |                  |       |        | mean                | -33.7                           | 5.2                            | 45.2 | 2.4 | 25.2          | 14.8                   | na                      |
|                                    |                  |       |        | 1 $\sigma$          | 2.8                             | 1.7                            | 1.4  | 1.0 | 9.8           | 6.1                    | na                      |
| <i>Cissus dinklagei</i>            | Vitaceae         | liana | fruit  | food                | -27.9                           | 4.3                            | 42.1 | 1.2 | 39.6          | 7.7                    | 3.86                    |
| <i>Cissus dinklagei</i>            | Vitaceae         | liana | fruit  | food                | -27.3                           | 2.6                            | 39.9 | 0.7 | 62.7          | 4.6                    | na                      |
| <i>Dictyophleba ochracea</i>       | Apocynaceae      | liana | fruit  | food                | -28.4                           | 6.0                            | 47.2 | 1.5 | 36.9          | 9.3                    | 5.11                    |
| <i>Ficus sp.</i>                   | Moraceae         | liana | fruit  | food                | -30.4                           | 7.2                            | 48.8 | 1.1 | 51.5          | 6.9                    | 6.11                    |
| <i>Ficus sp.</i>                   | Moraceae         | liana | fruit  | food                | -32.5                           | 5.8                            | 50.1 | 1.1 | 51.2          | 7.1                    | 6.11                    |
| <i>Landolphia owariensis</i>       | Apocynaceae      | liana | fruit  | food                | -27.1                           | 5.0                            | 45.0 | 0.9 | 58.2          | 5.6                    | 6.19                    |
| <i>Manniophyton fulvum</i>         | Euphorbiaceae    | liana | leaves | food                | -29.8                           | 7.8                            | 50.6 | 2.1 | 28.3          | 13.0                   | na                      |
| <i>Manniophyton fulvum</i>         | Euphorbiaceae    | liana | leaves | medicine            | -33.5                           | 5.9                            | 43.7 | 2.2 | 23.2          | 13.7                   | na                      |
| <i>Manniophyton fulvum</i>         | Euphorbiaceae    | liana | leaves | medicine            | -32.7                           | 3.1                            | 42.9 | 2.2 | 22.5          | 13.9                   | na                      |
| <i>Manniophyton fulvum</i>         | Euphorbiaceae    | liana | leaves | medicine            | -31.3                           | 6.3                            | 46.5 | 2.8 | 19.5          | 17.4                   | na                      |
|                                    |                  |       |        | mean                | -30.1                           | 5.4                            | 45.7 | 1.6 | 39.4          | 9.9                    | 5.5                     |
|                                    |                  |       |        | 1 $\sigma$          | 2.3                             | 1.7                            | 3.6  | 0.7 | 15.8          | 4.3                    | 1.0                     |
| <i>Blighia welwitschii</i>         | Sapindaceae      | tree  | fruit  | food                | -28.6                           | 5.3                            | 71.6 | 2.5 | 33.6          | 15.5                   | 10.16                   |
| <i>Canarium schweinfurthii</i>     | Burseraceae      | tree  | fruit  | food                | -29.3                           | 6.1                            | 62.2 | 0.9 | 77.6          | 5.8                    | 6.03                    |
| <i>Celtis brieiyi</i>              | Ulmaceae         | tree  | fruit  | food                | -29.2                           | 3.2                            | 46.2 | 2.4 | 22.2          | 15.2                   | na                      |
| <i>Colletocera dewevrei</i>        | Rubiaceae        | tree  | fruit  | food                | -28.2                           | 5.7                            | 45.9 | 1.7 | 32.5          | 10.3                   | na                      |
| <i>Dialium sp.</i>                 | Caesalpiniaceae  | tree  | fruit  | food                | -30.5                           | 6.7                            | 51.1 | 2.7 | 22.2          | 16.8                   | 10.37                   |
| <i>Dialium sp.</i>                 | Caesalpiniaceae  | tree  | fruit  | food                | -24.7                           | 5.1                            | 40.4 | 0.7 | 63.7          | 4.6                    | 10.37                   |
| <i>Drypetes cinnabarina</i>        | Euphorbiaceae    | tree  | fruit  | food                | -28.7                           | 6.1                            | 47.2 | 1.2 | 44.5          | 7.7                    | 4.66                    |
| <i>Gambeya lacourtiana</i>         | Sapotaceae       | tree  | fruit  | food                | -29.6                           | 7.4                            | 52.7 | 1.1 | 58.5          | 6.6                    | 6.71                    |
| <i>Gambeya lacourtiana</i>         | Sapotaceae       | tree  | fruit  | food                | -25.7                           | 5.1                            | 58.4 | 1.5 | 44.4          | 9.6                    | 6.71                    |
| <i>Gambeya lacourtiana</i>         | Sapotaceae       | tree  | fruit  | food                | -28.4                           | 6.6                            | 55.9 | 1.1 | 61.4          | 6.6                    | 6.71                    |
| <i>Garcinia punctata</i>           | Clusiaceae       | tree  | fruit  | food                | -29.1                           | 6.2                            | 49.0 | 1.2 | 47.0          | 7.6                    | 5.9                     |
| <i>Garcinia punctata</i>           | Clusiaceae       | tree  | fruit  | food                | -31.6                           | 6.1                            | 54.8 | 1.0 | 64.4          | 6.2                    | na                      |
| <i>Grewia coriacea</i>             | Tiliaceae        | tree  | fruit  | food                | -28.2                           | 4.9                            | 42.4 | 1.0 | 47.9          | 6.5                    | 14.99                   |
| <i>Irvingia gabonensis</i>         | Irvingiaceae     | tree  | fruit  | food                | -26.9                           | 6.0                            | 43.9 | 0.9 | 55.0          | 5.8                    | na                      |
| <i>Irvingia sp.</i>                | Irvingiaceae     | tree  | fruit  | food                | -26.4                           | 6.6                            | 45.6 | 1.5 | 36.6          | 9.1                    | 6.83                    |
| <i>Klainedoxa gabonensis</i>       | Irvingiaceae     | tree  | fruit  | food                | -33.4                           | 5.4                            | 43.9 | 1.1 | 47.4          | 6.8                    | 2.3                     |
| <i>Mammea africana</i>             | Clusiaceae       | tree  | fruit  | food                | -27.7                           | 4.6                            | 47.5 | 0.6 | 87.4          | 4.0                    | 4.83                    |
| <i>Manilkara yangambiensis</i>     | Sapotaceae       | tree  | fruit  | food                | -27.1                           | 4.6                            | 45.2 | 0.9 | 57.3          | 5.8                    | 4.71                    |
| <i>Nuclea sp.</i>                  | Rubiaceae        | tree  | fruit  | food                | -28.1                           | 7.0                            | 45.9 | 0.4 | 124.4         | 2.7                    | na                      |
| <i>Pancovia laurentii</i>          | Sapindaceae      | tree  | fruit  | food                | -28.2                           | 6.1                            | 45.9 | 2.5 | 21.1          | 15.9                   | 7.13                    |
| <i>Pancovia laurentii</i>          | Sapindaceae      | tree  | fruit  | food                | -27.1                           | 5.7                            | 43.7 | 1.1 | 44.5          | 7.2                    | 7.13                    |
| <i>Parinari excelsa</i>            | Chrysobalanaceae | tree  | fruit  | food                | -28.5                           | 5.7                            | 46.9 | 0.8 | 65.2          | 5.2                    | 4.8                     |
| <i>Phyllanthus pynaertii</i>       | Euphorbiaceae    | tree  | fruit  | food                | -29.9                           | 2.5                            | 44.1 | 1.2 | 43.1          | 7.5                    | na                      |
| <i>Scorodophloeus zenkeri</i>      | Caesalpiniaceae  | tree  | fruit  | food                | -26.6                           | 7.0                            | 46.3 | 3.6 | 14.9          | 22.6                   | 16.94                   |
| <i>Sorindea sp.</i>                | Anacardiaceae    | tree  | fruit  | food                | -28.9                           | 6.9                            | 47.7 | 1.3 | 44.3          | 7.8                    | 7.83                    |
| <i>Synsepalum sp.</i>              | Sapotaceae       | tree  | fruit  | food                | -26.2                           | 3.5                            | 41.8 | 1.6 | 30.8          | 9.9                    | 11.28                   |
| <i>Tessmannia africana</i>         | Caesalpiniaceae  | tree  | fruit  | food                | -27.1                           | 7.6                            | 43.0 | 2.5 | 20.1          | 15.6                   | na                      |
| <i>Trichoscypha arborescens</i>    | Anacardiaceae    | tree  | fruit  | food                | -27.2                           | 6.6                            | 49.5 | 1.2 | 47.2          | 7.7                    | 4.16                    |
| <i>Trichoscypha arborescens</i>    | Anacardiaceae    | tree  | fruit  | food                | -27.8                           | 4.7                            | 42.8 | 1.5 | 33.8          | 9.2                    | na                      |
| Unidentified                       | Vitaceae         | tree  | fruit  | food                | -27.8                           | 6.5                            | 52.9 | 1.0 | 62.3          | 6.2                    | 7.51                    |
| <i>Campostylus mannii</i>          | Flacourtiaceae   | tree  | fruit  | non-food            | -34.2                           | 7.5                            | 51.2 | 2.3 | 26.1          | 14.3                   | na                      |
| <i>Drypetes cinnabarina</i>        | Euphorbiaceae    | tree  | fruit  | non-food            | -26.9                           | 5.3                            | 48.8 | 1.1 | 49.5          | 7.2                    | 9.3                     |
| <i>Onkogeia gore</i>               | Olivaceae        | tree  | fruit  | non-food            | -28.3                           | 5.6                            | 45.4 | 2.1 | 25.6          | 12.9                   | 13.99                   |
| <i>Picalima nitida</i>             | Apocynaceae      | tree  | fruit  | non-food            | -32.2                           | 9.3                            | 44.3 | 1.4 | 35.7          | 9.0                    | na                      |
|                                    |                  |       |        | tree fruit mean     | -28.5                           | 5.9                            | 48.4 | 1.5 | 46.8          | 9.2                    | 8.0                     |
|                                    |                  |       |        | 1 $\sigma$          | 2.1                             | 1.3                            | 6.4  | 0.7 | 21.9          | 4.4                    | 3.6                     |
| <i>Cynometra sessiliflora</i>      | Caesalpiniaceae  | tree  | leaves | food                | -29.6                           | 7.1                            | 50.8 | 2.7 | 22.1          | 16.8                   | na                      |
| <i>Gilbertiodendron dewevrei</i>   | Caesalpiniaceae  | tree  | seed   | food                | -28.2                           | 6.1                            | 42.8 | 0.9 | 58.1          | 5.4                    | 6.04                    |
| <i>Phyllanthus pynaertii</i>       | Euphorbiaceae    | tree  | stem   | food                | -32.0                           | 3.9                            | 42.6 | 3.4 | 14.6          | 21.2                   | 19.93                   |
| <i>Phyllanthus pynaertii</i>       | Euphorbiaceae    | tree  | stem   | food                | -30.4                           | 4.1                            | 42.4 | 2.1 | 23.4          | 13.2                   | 19.93                   |
| <i>Scorodophloeus zenkeri</i>      | Caesalpiniaceae  | tree  | leaf   | food                | -31.1                           | 8.3                            | 46.6 | 5.2 | 10.5          | 32.2                   | 20.21                   |
| <i>Scorodophloeus zenkeri</i>      | Caesalpiniaceae  | tree  | leaves | food                | -33.4                           | 8.3                            | 40.9 | 2.0 | 23.5          | 12.7                   | 20.21                   |
| <i>Scorodophloeus zenkeri</i>      | Caesalpiniaceae  | tree  | leaves | food                | -33.4                           | 8.3                            | 41.6 | 3.5 | 14.0          | 21.7                   | 20.21                   |
| <i>Scorodophloeus zenkeri</i>      | Caesalpiniaceae  | tree  | seed   | food                | -26.7                           | 7.4                            | 41.1 | 3.2 | 15.0          | 20.0                   | 16.94                   |
| <i>Thonnera congolana</i>          | Annonaceae       | tree  | seed   | non-food            | -32.5                           | 7.9                            | 54.8 | 2.2 | 29.3          | 13.7                   | 7.45                    |
| <i>Cleistopholis sp.</i>           | Annonaceae       | tree  | bark   | non-food            | -28.8                           | 3.2                            | 49.9 | 0.6 | 97.6          | 3.7                    | na                      |
| <i>Dicranolepis soyauxii</i>       | Thymeleaceae     | tree  | bark   | non-food            | -29.4                           | 5.1                            | 52.8 | 0.5 | 113.8         | 3.4                    | na                      |
| <i>Dicranolepis soyauxii</i>       | Thymeleaceae     | tree  | bark   | non-food            | -29.6                           | 4.7                            | 54.6 | 0.6 | 108.1         | 3.7                    | na                      |
| <i>Pancovia laurentii</i>          | Sapindaceae      | tree  | seed   | non-food            | -28.5                           | 6.8                            | 46.4 | 2.3 | 23.7          | 14.2                   | 9.88                    |
| Unidentified                       | Unidentified     | tree  | bark   | non-food            | -26.9                           | 4.3                            | 47.2 | 1.2 | 47.6          | 7.2                    | na                      |
|                                    |                  |       |        | tree non-fruit mean | -30.0                           | 6.1                            | 46.7 | 2.2 | 43.0          | 13.5                   | 15.6                    |
|                                    |                  |       |        | 1 $\sigma$          | 2.2                             | 1.8                            | 5.1  | 1.4 | 36.9          | 8.5                    | 6.1                     |
